# Supplementary material
Source: publisher figshare collection journal article supplement (https://gsajournals.figshare.com/ndownloader/files/24564842)
Supplement: Supplementary file 1 [file 24564842]

## Additional Discussion for Implicated Genes

The region on chromosome 7 is closest to the gene *Catsperg2*, which is a calcium ion channel associated with sperm activity (Wang *et al.* 2009). Although this is yet another calcium homeostasis gene and provides for some interesting hypotheses, unpublished data demonstrates no clear differences between HR and C sperm (S. A. Kelly and T. Garland, Jr., personal communication). Additionally, the more differentiated loci within this region are downstream of this gene and cover an expanse with no verified annotations.

A chromosome 11 region including *Sox9* was found to be differentiated. Sox9 is a transcription factor with extensive influence on a vast variety of phenotypes. Many of these are associated with sex determination (Jakob and Lovell-Badge 2011) and cartilage development (Lefebvre *et al.* 2019), the latter having large implications for skeletal development (Bi *et al.* 2001). Knockouts have also generated changes in heart (Lincoln *et al.* 2007) and neural (Cheung *et al.* 2005) development. With the widespread implications this gene could have for the HR mice, more research will have to be done to understand the specific role of *Sox9* in voluntary wheel-running behavior.

On chromosome 16, *Tnk2* (aka *ACK1*) has elevated expression levels in the brain as compared with other organs, with further expression increases during development (La Torre *et al.* 2006). *Ubxn7* knockouts have produced mice with stunted growth (The International Mouse Phenotyping Consortium *et al.* 2016). But the seemingly most relevant gene for the HR and C differentiation is *Fbxo45*. *Fbxo45* is essential for neuronal development (Saiga *et al.* 2009) and synaptic transmission (Tada *et al.* 2010). Furthermore, this gene is shown to interact with N-cadherin (Cdh2, neuronal cell adhesion molecule important for neuronal development) in a calcium-dependent manner to stabilize N-cadherin (Chung *et al.* 2014).

## Bibliography

Bi W., W. Huang, D. J. Whitworth, J. M. Deng, Z. Zhang, *et al.*, 2001 Haploinsufficiency of *Sox9* results in defective cartilage primordia and premature skeletal mineralization. Proceedings of the National Academy of Sciences 98: 6698–6703. https://doi.org/10.1073/pnas.111092198

Cheung M., M.-C. Chaboissier, A. Mynett, E. Hirst, A. Schedl, *et al.*, 2005 The transcriptional control of trunk neural crest induction, survival, and delamination. Developmental Cell 8: 179–192. https://doi.org/10.1016/j.devcel.2004.12.010

Chung F.-Z., A. A. Sahasrabuddhe, K. Ma, X. Chen, V. Basrur, *et al.*, 2014 Fbxo45 inhibits calcium-sensitive proteolysis of N-cadherin and promotes neuronal differentiation. Journal of Biological Chemistry 289: 28448–28459. https://doi.org/10.1074/jbc.M114.561241

Jakob S., and R. Lovell-Badge, 2011 Sex determination and the control of *Sox9* expression in mammals: *Sox9* expression in mammals. FEBS Journal 278: 1002–1009. https://doi.org/10.1111/j.1742-4658.2011.08029.x

La Torre A., J. A. del Rio, E. Soriano, and J. M. Ureña, 2006 Expression pattern of ACK1 tyrosine kinase during brain development in the mouse. Gene Expression Patterns 6: 886–892. https://doi.org/10.1016/j.modgep.2006.02.009

Lefebvre V., M. Angelozzi, and A. Haseeb, 2019 SOX9 in cartilage development and disease. Current Opinion in Cell Biology 61: 39–47. https://doi.org/10.1016/j.ceb.2019.07.008

Lincoln J., R. Kist, G. Scherer, and K. E. Yutzey, 2007 Sox9 is required for precursor cell expansion and extracellular matrix organization during mouse heart valve development. Developmental Biology 305: 120–132. https://doi.org/10.1016/j.ydbio.2007.02.002

Lindhout F. W., Y. Cao, J. T. Kevenaar, A. Bodzęta, R. Stucchi, *et al.*, 2019 VAP‐SCRN1 interaction regulates dynamic endoplasmic reticulum remodeling and presynaptic function. The EMBO Journal. https://doi.org/10.15252/embj.2018101345

Saiga T., T. Fukuda, M. Matsumoto, H. Tada, H. J. Okano, *et al.*, 2009 Fbxo45 forms a novel ubiquitin ligase complex and is required for neuronal development. Molecular and Cellular Biology 29: 3529–3543. https://doi.org/10.1128/MCB.00364-09

Tada H., H. J. Okano, H. Takagi, S. Shibata, I. Yao, *et al.*, 2010 Fbxo45, a novel ubiquitin ligase, regulates synaptic activity. Journal of Biological Chemistry 285: 3840–3849. https://doi.org/10.1074/jbc.M109.046284

The International Mouse Phenotyping Consortium, M. E. Dickinson, A. M. Flenniken, X. Ji, L. Teboul, *et al.*, 2016 High-throughput discovery of novel developmental phenotypes. Nature 537: 508–514. https://doi.org/10.1038/nature19356

Wang H., J. Liu, K.-H. Cho, and D. Ren, 2009 A novel, single, transmembrane protein CATSPERG is associated with CATSPER1 channel protein1. Biology of Reproduction 81: 539–544. https://doi.org/10.1095/biolreprod.109.077107
